# Supplementary material
Source: Springer Nature journal article supplement (https://www.springermedizin.de/resource/supplementary/12876_2010_473_MOESM1_ESM.pdf/9437086)

## Recovery phase model

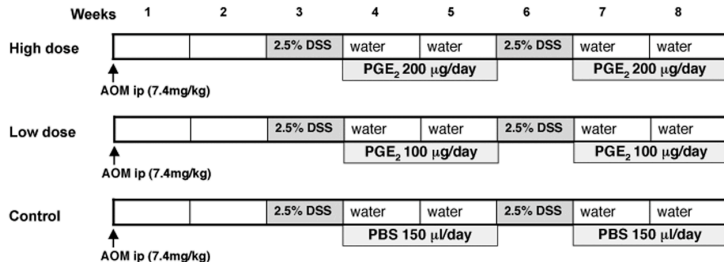

## Acute phase model

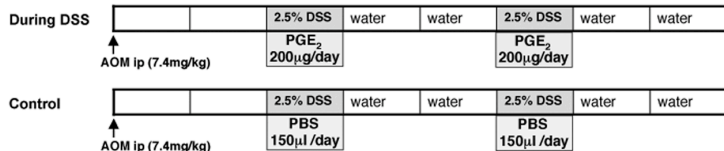

Supplement: MOESM1 [file 9437086]
